# Supplementary material for: Knockdown of long non-coding RNA NEAT1 relieves inflammation of ulcerative colitis by regulating the miR-603/FGF9 pathway
Source: PubMed Central journal article supplement — Exp Ther Med. 2021 Dec 10;23(2):131. doi: 10.3892/etm.2021.11054 (PMC8713162; doi:10.3892/etm.2021.11054), 2021-12-10

Figure S1. Relative miR-603 expression was detected by reverse transcription-quantitative PCR. The results revealed that miR-603 expression increased in FHCs co-transfected with miR-NC mimics and miR-603 mimics. However, miR-603 expression decreased in FHCs co-transfected with miR-NC inhibitor and miR-603 inhibitor. \*\*P<0.01 vs. miR-NC mimics/inhibitor. miR, microRNA; NC, negative control.

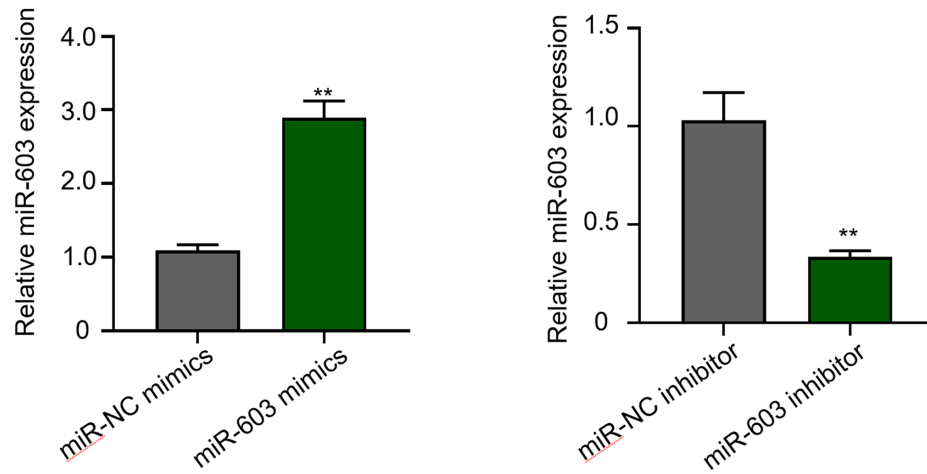

Supplement: Supplementary_Data.pdf [file Supplementary_Data.pdf]
